# Supplementary material
Source: PubMed Central journal article supplement (PMC3431668)
Supplement: supp_M112.347823_jbc.M112.347823-3.pdf [file supp_M112.347823_jbc.M112.347823-3.pdf]

### Comparison of MALDI and ESI MS Data

| MALDI-MS     | MALDI-1       | MALDI-2        | MALDI-3        | MALDI Avg | MALDI SD | Std Error Mean |
|--------------|---------------|----------------|----------------|-----------|----------|----------------|
| Cyclic       | 341.5         | 867.4          | 0.0            | 403.0     | 437.0    | 252.3          |
| Linear       | 1239.8        | 7496.2         | 2589.8         | 3775.3    | 3292.4   | 1900.8         |
| +G           | 2031.8        | 38148.7        | 11941.8        | 17374.1   | 18661.2  | 10774.0        |
| +GL          | 1218.7        | 9779.3         | 3913.8         | 4970.6    | 4377.0   | 2527.1         |
| +GLP         | 714.9         | 1908.7         | 637.9          | 1087.2    | 712.5    | 411.4          |
| <b>Total</b> | <b>5546.7</b> | <b>58200.3</b> | <b>19083.3</b> |           |          |                |

| ESI-MS       | ESI 1          | ESI 2          | ESI 3          | ESI Avg | ESI SD | Std Error Mean |
|--------------|----------------|----------------|----------------|---------|--------|----------------|
| kB1 Cyclic   | 0.0            | 0.0            | 0.0            | 0.0     | 0.0    | 0.0            |
| kB1 Linear   | 1514.7         | 5231.4         | 2032.3         | 2926.1  | 2013.1 | 1162.3         |
| kB1+G        | 5499.3         | 21588.8        | 8490.8         | 11859.6 | 8557.5 | 4940.7         |
| kB1+GL       | 5561.3         | 11862.9        | 9039.2         | 8821.1  | 3156.5 | 1822.4         |
| kB1+GLP      | 1378.2         | 2053.6         | 1029.5         | 1487.1  | 520.7  | 300.6          |
| <b>Total</b> | <b>13953.4</b> | <b>40736.7</b> | <b>20591.8</b> |         |        |                |

| MALDI-MS     | MALDI-1     | MALDI-2     | MALDI-3     | MALDI Av    | MALDI SD | Std Error mean |
|--------------|-------------|-------------|-------------|-------------|----------|----------------|
| Cyclic       | 6.2%        | 1.5%        | 0.0%        | 2.5%        | 3.2%     | 1.9%           |
| Linear       | 22.4%       | 12.9%       | 13.6%       | 16.3%       | 5.3%     | 3.0%           |
| +G           | 36.6%       | 65.5%       | 62.6%       | 54.9%       | 15.9%    | 9.2%           |
| +GL          | 22.0%       | 16.8%       | 20.5%       | 19.8%       | 2.7%     | 1.5%           |
| +GLP         | 12.9%       | 3.3%        | 3.3%        | 6.5%        | 5.5%     | 3.2%           |
| <b>Total</b> | <b>100%</b> | <b>100%</b> | <b>100%</b> | <b>100%</b> |          |                |

| ESI-MS       | ESI 1       | ESI 2       | ESI 3       | ESI Av      | ESI SD | Std Error mean |
|--------------|-------------|-------------|-------------|-------------|--------|----------------|
| kB1 Cyclic   | 0           | 0           | 0           | 0           | 0      | 0.0%           |
| kB1 Linear   | 10.9%       | 12.8%       | 9.9%        | 11.2%       | 1.5%   | 0.9%           |
| kB1+G        | 39.4%       | 53.0%       | 41.2%       | 44.5%       | 7.4%   | 4.3%           |
| kB1+GL       | 39.9%       | 29.1%       | 43.9%       | 37.6%       | 7.6%   | 4.4%           |
| kB1+GLP      | 9.9%        | 5.0%        | 5.0%        | 6.6%        | 2.8%   | 1.6%           |
| <b>Total</b> | <b>100%</b> | <b>100%</b> | <b>100%</b> | <b>100%</b> |        |                |

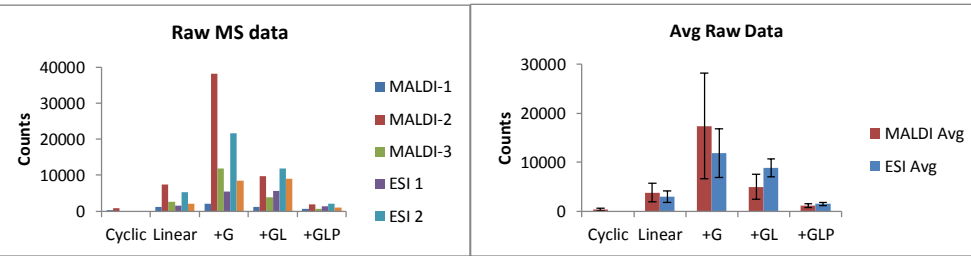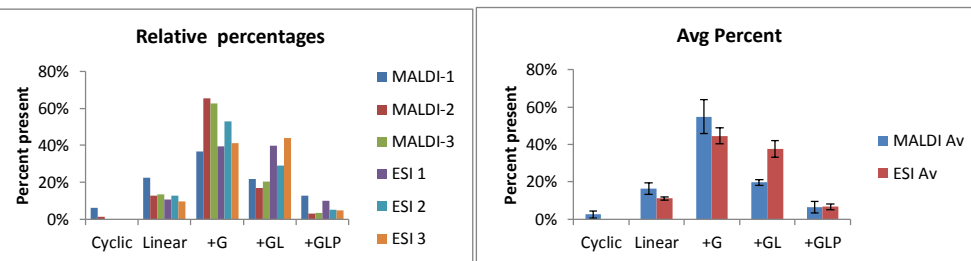

Supp Fig 3: ESI-MS compared to MALDI MS for the Oak1-GLP\* construct which was the "best" data collected by ESI-MS. All other mutants were much lower in peak area. The cyclic form could not be detected unless using MALDI-MS.

**Group Statistics**

| type              | N | Mean     | Std. Deviation | Std. Error Mean |
|-------------------|---|----------|----------------|-----------------|
| Output MALDLinear | 3 | 3775.333 | 3292.134       | 1900.714        |
| ESILinear         | 3 | 2926.139 | 2013.127       | 1162.279        |

**Independent Samples Test**

|        |                             | Equality of |      | t-test for Equality of Means |       |                 |                 |                       |                   |          |
|--------|-----------------------------|-------------|------|------------------------------|-------|-----------------|-----------------|-----------------------|-------------------|----------|
|        |                             | F           | Sig. | t                            | df    | Sig. (2-tailed) | Mean Difference | Std. Error Difference | of the Difference |          |
|        |                             |             |      |                              |       |                 |                 |                       | Lower             | Upper    |
| Output | Equal variances assumed     | 1.261       | .324 | .381                         | 4     | .722            | 849.194         | 2227.916              | -5336.492         | 7034.880 |
|        | Equal variances not assumed |             |      | .381                         | 3.312 | .726            | 849.194         | 2227.916              | -5877.514         | 7575.902 |

**Group Statistics**

| type           | N | Mean      | Std. Deviation | Std. Error Mean |
|----------------|---|-----------|----------------|-----------------|
| Output MALDI+G | 3 | 17374.333 | 18661.246      | 10774.075       |
| ESI+G          | 3 | 11859.623 | 8557.474       | 4940.660        |

**Independent Samples Test**

|        |                             | Equality of |      | t-test for Equality of Means |       |                 |                 |                       |                   |           |
|--------|-----------------------------|-------------|------|------------------------------|-------|-----------------|-----------------|-----------------------|-------------------|-----------|
|        |                             | F           | Sig. | t                            | df    | Sig. (2-tailed) | Mean Difference | Std. Error Difference | of the Difference |           |
|        |                             |             |      |                              |       |                 |                 |                       | Lower             | Upper     |
| Output | Equal variances assumed     | 2.303       | .204 | .465                         | 4     | .666            | 5514.710        | 11852.882             | -27394.167        | 38423.588 |
|        | Equal variances not assumed |             |      | .465                         | 2.806 | .675            | 5514.710        | 11852.882             | -33729.728        | 44759.148 |

**Group Statistics**

| type            | N | Mean     | Std. Deviation | Std. Error Mean |
|-----------------|---|----------|----------------|-----------------|
| Output MALDI+GL | 3 | 4970.667 | 4376.735       | 2526.909        |
| ESI+GL          | 3 | 8821.122 | 3156.454       | 1822.380        |

**Independent Samples Test**

|        |                             | Equality of |      | t-test for Equality of Means |       |                 |                 |                       |                   |          |
|--------|-----------------------------|-------------|------|------------------------------|-------|-----------------|-----------------|-----------------------|-------------------|----------|
|        |                             | F           | Sig. | t                            | df    | Sig. (2-tailed) | Mean Difference | Std. Error Difference | of the Difference |          |
|        |                             |             |      |                              |       |                 |                 |                       | Lower             | Upper    |
| Output | Equal variances assumed     | .483        | .525 | -1.236                       | 4     | .284            | -3850.455       | 3115.499              | -12500.468        | 4799.558 |
|        | Equal variances not assumed |             |      | -1.236                       | 3.637 | .290            | -3850.455       | 3115.499              | -12851.292        | 5150.381 |

**Group Statistics**

| type             | N | Mean     | Std. Deviation | Std. Error Mean |
|------------------|---|----------|----------------|-----------------|
| Output MALDI+GLP | 3 | 1087.333 | 712.625        | 411.434         |
| ESI+GLP          | 3 | 1487.102 | 520.665        | 300.606         |

**Independent Samples Test**

|        |                             | Equality of |      | t-test for Equality of Means |       |                 |                 |                       |                   |          |
|--------|-----------------------------|-------------|------|------------------------------|-------|-----------------|-----------------|-----------------------|-------------------|----------|
|        |                             | F           | Sig. | t                            | df    | Sig. (2-tailed) | Mean Difference | Std. Error Difference | of the Difference |          |
|        |                             |             |      |                              |       |                 |                 |                       | Lower             | Upper    |
| Output | Equal variances assumed     | .756        | .434 | -.785                        | 4     | .477            | -399.768        | 509.551               | -1814.509         | 1014.972 |
|        | Equal variances not assumed |             |      | -.785                        | 3.662 | .480            | -399.768        | 509.551               | -1867.570         | 1068.034 |

Supp Fig 3: Statistical comparison of the raw data produced by MALDI and ESI-MS.
