# Supplementary material
Source: PubMed Central journal article supplement (PMC3431668)
Supplement: supp_M112.347823_jbc.M112.347823-4.pdf [file supp_M112.347823_jbc.M112.347823-4.pdf]

**Analysis of cyclic protein versus Oak1 (two tailed t-test)**

| <b>Construct</b> | <b>Av % cyclic peptide</b> | <b>p-value</b> |
|------------------|----------------------------|----------------|
| Oak1             | 5.1%                       | 1.00           |
| L31I             | 5.2%                       | 0.94           |
| GIP              | 3.9%                       | 0.66           |
| R28K             | 5.4%                       | 0.88           |
| R28A             | 10.3%                      | 0.04           |
| K-1A             | 6.3%                       | 0.47           |
| GLP              | 2.5%                       | 0.32           |
| GL               | 3.7%                       | 0.47           |
| L-2A             | 5.3%                       | 0.92           |
| GLA              | 2.6%                       | 0.21           |
| SLP              | 2.8%                       | 0.49           |
| ALA              | 0.6%                       | 0.05           |
| G30A             | 3.1%                       | 0.46           |

Supp Fig 4: Analysis of the levels of cyclic peptide as compared to wt-Oak1
